# Supplementary material
Source: PubMed Central journal article supplement (PMC5629117)

# Supplemental Data Set 5

Figure 1A

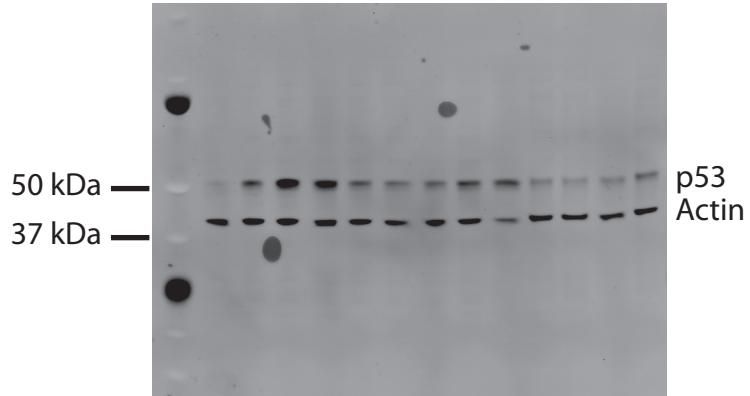

Figure 2A

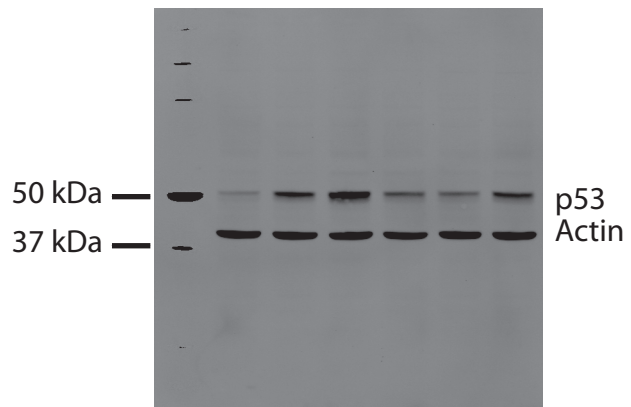

Figure 5A

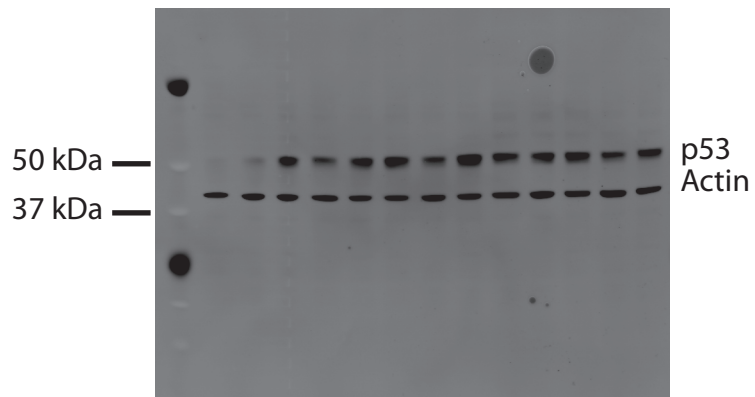

Supplement: NIHMS904239-supplement-6.pdf [file NIHMS904239-supplement-6.pdf]
